# Supplementary material for: A new synthetic route to bulky “second generation” tris(imidazol-2-ylidene)borate ligands: synthesis of a four coordinate iron(ii) complex
Source: Royal Society of Chemistry journal article supplement (doi:10.1039/b505985b), 2005-01-01
Supplement: b505985b.pdf [file b505985b.pdf]

## Supplementary Information

**General procedures.** All manipulations were performed under a nitrogen atmosphere by standard Schlenk techniques or in an M. Braun Labmaster glove box maintained at or below 1 ppm of O<sub>2</sub> and H<sub>2</sub>O. Glassware was dried at 150 °C overnight. NMR data were recorded on a Varian Unity 400 spectrometer (400 MHz) at 22 °C. Diethyl ether, tetrahydrofuran and toluene were purified by the Glass Contour solvent purification system. Deuterated benzene was first dried over CaH<sub>2</sub>, then over Na/benzophenone, and then vacuum transferred into a storage container. Before use, an aliquot of each solvent was tested with a drop of sodium benzophenone ketyl in THF solution. Celite was dried overnight at 200 °C under vacuum. 1-*tert*-Butylimidazole<sup>1</sup> and Me<sub>3</sub>N:BHBr<sub>2</sub><sup>2</sup> were prepared and purified according to literature procedures. All peaks in the NMR spectra are referenced to residual CHCl<sub>3</sub> at δ 7.27 ppm or C<sub>6</sub>D<sub>5</sub>H at δ 7.16 ppm, respectively. For paramagnetic samples, the following are listed in parentheses: peak width at half-height in Hz, integration and assignment. Solution magnetic susceptibilities were determined by the Evans method.<sup>3</sup> Electrospray mass spectral data were collected using a Waters-Micromass ZQ2000 Mass Spectrometer using CH<sub>3</sub>CN as solvent.

**Preparation of HB(<sup>t</sup>Bu-Im)<sub>3</sub>(Br)<sub>2</sub>:** A solution of *tert*-butyl imidazole (2.00 g, 16.1 mmol) and Me<sub>3</sub>N:BHBr<sub>2</sub> (1.24 g, 5.4 mol) in chlorobenzene (20 mL) was heated at reflux for 1 day. The reaction mixture was cooled to room temperature and the volatiles were removed *in vacuo* to afford a white solid. The solid was dissolved in CH<sub>2</sub>Cl<sub>2</sub> (~20 mL) and diethyl ether added to give a white precipitate (1.98 g, 68% yield). Alternatively the CH<sub>2</sub>Cl<sub>2</sub> solution can be cooled to -25 °C to give a white solid in ~60% yield.

Mp 273-275 °C. <sup>1</sup>H NMR (CDCl<sub>3</sub>): δ 9.73 (s, 3H, HB(<sup>t</sup>Bu-Im)<sub>3</sub>), δ 8.38 (s, 3H, HB(<sup>t</sup>Bu-Im)<sub>3</sub>), δ 7.31 (s, 3H, HB(<sup>t</sup>Bu-Im)<sub>3</sub>), δ 1.71 (s, 27H, HB(<sup>t</sup>Bu-Im)<sub>3</sub>). <sup>13</sup>C NMR (CDCl<sub>3</sub>): δ 138 (HB(<sup>t</sup>Bu-C<sub>3</sub>H<sub>3</sub>N<sub>2</sub>)<sub>3</sub>), δ 125 (HB(<sup>t</sup>Bu-C<sub>3</sub>H<sub>3</sub>N<sub>2</sub>)<sub>3</sub>), δ 120 (HB(<sup>t</sup>Bu-C<sub>3</sub>H<sub>3</sub>N<sub>2</sub>)<sub>3</sub>), δ 60 (HB(Im-C(CH<sub>3</sub>)<sub>3</sub>)<sub>3</sub>), δ 30 (HB(Im-C(CH<sub>3</sub>)<sub>3</sub>)<sub>3</sub>). IR (KBr, cm<sup>-1</sup>): 2474 (w, B-H). ESI<sup>+</sup>-MS 463 (C<sub>21</sub>H<sub>37</sub>N<sub>6</sub>BBr<sup>+</sup>). Elemental analysis (%) calcd for C<sub>21</sub>H<sub>37</sub>N<sub>6</sub>BBr<sub>2</sub>: C 46.35, H 6.85, N 15.44; found: C 46.05, H 6.71, N 15.15.

**Preparation of  $\kappa^3$ -HB(<sup>t</sup>Bu-Im)<sub>3</sub>MgBr:** In the dry box, a solution of MeMgBr (2.14 mL, 6.43 mmol, 3.0 M soln. in Et<sub>2</sub>O) was added to a slurry of HB(<sup>t</sup>Bu-Im)<sub>3</sub>(Br)<sub>2</sub> (1.0 g, 1.84 mmol) in THF (15 mL). After a day of stirring at room temperature, the volatiles were removed *in vacuo* to give a white residue. The residue was extracted with copious amounts of toluene and filtered through a plug of Celite to give a colourless solution. The solution was cooled to -35 °C to yield a colourless solid (792 mg, 88%).

Mp 268-270°C. <sup>1</sup>H NMR (C<sub>6</sub>D<sub>6</sub>): δ 7.09 (s, 3H, HB(<sup>t</sup>Bu-Im)<sub>3</sub>), 6.37 (s, 3H, HB(<sup>t</sup>Bu-Im)<sub>3</sub>), 1.47 (s, 27H, HB(<sup>t</sup>Bu-Im)<sub>3</sub>). <sup>13</sup>C NMR (C<sub>6</sub>D<sub>6</sub>): δ 185, 124, 115, 56, 32. IR (KBr, cm<sup>-1</sup>): 2469 (B-H). Elemental analysis (%) calcd for C<sub>21</sub>H<sub>34</sub>N<sub>6</sub>BBrMg: C 51.94, H 7.05, N 17.31; found: C 52.17, H 7.17, N 17.10.

**Preparation of  $\kappa^3$ -HB(<sup>t</sup>Bu-Im)<sub>3</sub>FeBr:** In the dry box, solid FeBr<sub>2</sub> (46 mg, 206 μmol) was added to a solution of { $\kappa^3$ -HB(<sup>t</sup>Bu-Im)<sub>3</sub>}MgBr (100 mg, 206 μmol) in THF (5 mL). After a day of stirring at room temperature, volatiles were removed *in vacuo*. The residue obtained was extracted with toluene, filtered through Celite, and pumped down to give a white solid (54 mg, 50% yield). Crystals suitable for X-ray determination were obtained from toluene at -35 °C. We have been unable to obtain satisfactory elemental analysis data for this complex.

Mp 110 °C (dec.). <sup>1</sup>H NMR (C<sub>6</sub>D<sub>6</sub>): δ 83 (412, 1H, HB(<sup>t</sup>Bu-Im)<sub>3</sub>), 77 (75, 3H, HB(<sup>t</sup>Bu-Im)<sub>3</sub>), 52 (105, 3H, HB(<sup>t</sup>Bu-Im)<sub>3</sub>), -18 (173, 27H, HB(<sup>t</sup>Bu-Im)<sub>3</sub>). IR (KBr, cm<sup>-1</sup>): 2482 (w, B-H).

## References:

1. A. E. Gridnev, I. M. Mihaltseva, *Synth. Commun.*, 1994, **24**, 1547.
2. M. A. Mathur, D. A. Moore, R. E. Popham, H. H. Sisler, S. Dolan, S. G. Shore, *Inorg. Synth.*, 1992, **29**, 51.
3. M. V. Baker, L. D. Field, T. W. Hambley, *Inorg. Chem.*, 1988, **27**, 2872.
